# Supplementary material for: Thermo-L-Asparaginases: From the Role in the Viability of Thermophiles and Hyperthermophiles at High Temperatures to a Molecular Understanding of Their Thermoactivity and Thermostability
Source: MDPI journal article supplement (doi:10.3390/ijms24032674), 2023-01-31
Supplement: s1 [file s1]

## Supplementary Materials

**Table S1.** Relative amino acid compositions of mesophilic and Thermo-ASNases

| Residue(s) | Proteins     |              | L-ASNase     |             |             |             |             |             |             |              |              |              |               |               |               |
|------------|--------------|--------------|--------------|-------------|-------------|-------------|-------------|-------------|-------------|--------------|--------------|--------------|---------------|---------------|---------------|
| Residue(s) | MP [91]      | TP/HP [91]   | <b>EcAI</b>  | <i>TkAI</i> | <i>TsAI</i> | <i>TzAI</i> | <i>PhAI</i> | <i>PfAI</i> | <i>PyAI</i> | <b>EcAII</b> | <i>MrAII</i> | <i>StAII</i> | <b>EcAIII</b> | <i>TkAIII</i> | <i>MrAIII</i> |
| Ala        | 8.09 ± 1.54  | 6.82 ± 1.42  | <b>8.58</b>  | 8.84        | 6.65        | 8.49        | 6.10        | 6.14        | 7.01        | <b>10.92</b> | 5.83         | 17.75        | <b>14.64</b>  | 12.42         | 10.56         |
| Cys        | 1.10 ± 0.18  | 0.86 ± 0.27  | <b>0.30</b>  | 0.00        | 0.30        | 0.00        | 0.00        | 0.61        | 0.00        | <b>0.58</b>  | 0.92         | 1.18         | <b>1.56</b>   | 0.33          | 0.62          |
| Asp        | 5.06 ± 0.18  | 4.63 ± 0.54  | <b>5.33</b>  | 5.79        | 5.74        | 5.46        | 5.18        | 6.44        | 4.88        | <b>7.76</b>  | 5.52         | 5.62         | <b>4.36</b>   | 4.90          | 5.59          |
| Glu        | 6.45 ± 0.54  | 8.55 ± 0.95  | <b>5.33</b>  | 6.71        | 6.34        | 7.27        | 7.01        | 6.44        | 8.23        | <b>2.01</b>  | 8.59         | 5.62         | <b>7.79</b>   | 9.48          | 5.28          |
| Phe        | 4.61 ± 0.78  | 4.40 ± 0.82  | <b>2.96</b>  | 2.44        | 2.1         | 3.03        | 3.05        | 2.76        | 2.13        | <b>3.16</b>  | 4.60         | 1.78         | <b>2.18</b>   | 3.27          | 5.59          |
| Gly        | 6.70 ± 0.96  | 7.16 ± 0.68  | <b>8.28</b>  | 9.76        | 8.16        | 10.91       | 9.45        | 9.20        | 9.76        | <b>8.62</b>  | 8.59         | 9.76         | <b>12.15</b>  | 12.09         | 11.80         |
| His        | 2.04 ± 0.21  | 1.57 ± 0.16  | <b>3.55</b>  | 1.52        | 1.21        | 2.12        | 0.92        | 0.92        | 1.22        | <b>0.86</b>  | 1.53         | 2.96         | <b>1.87</b>   | 1.31          | 1.55          |
| Ile        | 7.40 ± 1.69  | 7.82 ± 1.64  | <b>6.51</b>  | 7.62        | 11.18       | 6.97        | 11.28       | 9.20        | 5.79        | <b>3.74</b>  | 9.51         | 2.37         | <b>4.05</b>   | 6.21          | 7.45          |
| Lys        | 6.81 ± 2.00  | 7.61 ± 2.16  | <b>2.96</b>  | 3.96        | 10.27       | 6.06        | 7.01        | 6.14        | 3.66        | <b>6.90</b>  | 7.98         | 1.48         | <b>2.80</b>   | 8.50          | 7.45          |
| Leu        | 10.43 ± 0.55 | 10.21 ± 0.68 | <b>10.06</b> | 10.37       | 8.46        | 9.70        | 9.76        | 10.12       | 11.59       | <b>7.47</b>  | 7.98         | 11.24        | <b>9.66</b>   | 7.52          | 8.70          |
| Met        | 2.42 ± 0.28  | 2.29 ± 0.25  | <b>3.55</b>  | 3.05        | 4.23        | 2.73        | 3.66        | 3.68        | 3.96        | <b>2.30</b>  | 2.76         | 2.07         | <b>4.05</b>   | 3.60          | 3.73          |
| Asn        | 4.90 ± 1.20  | 3.52 ± 0.94  | <b>5.03</b>  | 3.05        | 4.23        | 2.42        | 2.74        | 4.29        | 2.44        | <b>6.61</b>  | 6.44         | 1.18         | <b>3.12</b>   | 2.29          | 6.21          |
| Pro        | 3.77 ± 0.77  | 4.36 ± 0.99  | <b>6.51</b>  | 5.49        | 4.53        | 5.46        | 3.96        | 3.99        | 5.49        | <b>3.74</b>  | 4.29         | 7.10         | <b>3.12</b>   | 2.61          | 2.17          |
| Gln        | 3.99 ± 0.75  | 1.78 ± 0.22  | <b>4.73</b>  | 1.22        | 0.91        | 1.21        | 1.22        | 1.23        | 0.92        | <b>3.74</b>  | 0.92         | 2.37         | <b>2.49</b>   | 0.65          | 1.86          |

Table S1. Cont.

| Residue(s)                         | Proteins    |             | L-ASNase     |              |              |              |              |              |              |              |              |              |               |               |               |
|------------------------------------|-------------|-------------|--------------|--------------|--------------|--------------|--------------|--------------|--------------|--------------|--------------|--------------|---------------|---------------|---------------|
|                                    | MP [91]     | TP/HP [91]  | <b>EcAI</b>  | <i>TkAI</i>  | <i>TsAI</i>  | <i>TzAI</i>  | <i>PhAI</i>  | <i>PfAI</i>  | <i>PyAI</i>  | <b>EcAII</b> | <i>MrAII</i> | <i>StAII</i> | <b>EcAIII</b> | <i>TkAIII</i> | <i>MrAIII</i> |
| Arg                                | 4.33 ± 0.98 | 5.57 ± 1.16 | <b>4.44</b>  | <i>7.01</i>  | <i>3.02</i>  | <i>4.24</i>  | <i>5.18</i>  | <i>4.60</i>  | <i>6.71</i>  | <b>2.30</b>  | <i>2.15</i>  | <i>7.99</i>  | <b>4.67</b>   | <i>4.25</i>   | <i>3.73</i>   |
| Ser                                | 6.08 ± 0.57 | 5.54 ± 1.01 | <b>4.73</b>  | <i>4.27</i>  | <i>4.23</i>  | <i>5.46</i>  | <i>6.71</i>  | <i>4.91</i>  | <i>3.66</i>  | <b>4.89</b>  | <i>5.22</i>  | <i>4.73</i>  | <b>4.98</b>   | <i>3.27</i>   | <i>4.66</i>   |
| Thr                                | 5.09 ± 0.57 | 4.34 ± 0.23 | <b>6.81</b>  | <i>7.93</i>  | <i>7.55</i>  | <i>6.67</i>  | <i>5.18</i>  | <i>6.75</i>  | <i>6.40</i>  | <b>10.06</b> | <i>6.14</i>  | <i>2.96</i>  | <b>5.92</b>   | <i>5.56</i>   | <i>3.73</i>   |
| Val                                | 6.35 ± 0.75 | 8.05 ± 0.68 | <b>5.92</b>  | <i>7.32</i>  | <i>6.04</i>  | <i>8.18</i>  | <i>7.01</i>  | <i>8.59</i>  | <i>11.59</i> | <b>10.63</b> | <i>7.06</i>  | <i>10.06</i> | <b>7.79</b>   | <i>8.82</i>   | <i>6.21</i>   |
| Trp                                | 1.02 ± 0.31 | 1.06 ± 0.20 | <b>0.30</b>  | <i>0.61</i>  | <i>0.60</i>  | <i>0.61</i>  | <i>0.92</i>  | <i>0.61</i>  | <i>1.52</i>  | <b>0.29</b>  | <i>0.61</i>  | <i>0.89</i>  | <b>0.31</b>   | <i>1.31</i>   | <i>0.00</i>   |
| Tyr                                | 3.30 ± 0.43 | 3.82 ± 0.33 | <b>4.14</b>  | <i>3.05</i>  | <i>4.23</i>  | <i>3.03</i>  | <i>3.66</i>  | <i>3.37</i>  | <i>3.05</i>  | <b>3.45</b>  | <i>3.37</i>  | <i>0.89</i>  | <b>2.49</b>   | <i>1.63</i>   | <i>3.11</i>   |
| Charged residues (DEKRH)           | 24.69       | 27.93       | <b>21.60</b> | <i>25.00</i> | <i>26.59</i> | <i>25.15</i> | <i>25.31</i> | <i>24.54</i> | <i>24.70</i> | <b>19.83</b> | <i>25.77</i> | <i>23.67</i> | <b>21.50</b>  | <i>28.43</i>  | <i>23.60</i>  |
| Polar/uncharged residues (GSTNQYC) | 31.26       | 27.02       | <b>34.02</b> | <i>29.28</i> | <i>29.61</i> | <i>29.33</i> | <i>28.96</i> | <i>30.36</i> | <i>23.18</i> | <b>37.94</b> | <i>31.59</i> | <i>23.08</i> | <b>32.71</b>  | <i>25.81</i>  | <i>31.99</i>  |
| Hydrophobic residues (LMIVWPAF)    | 44.09       | 45.01       | <b>44.39</b> | <i>45.74</i> | <i>43.81</i> | <i>45.16</i> | <i>45.74</i> | <i>45.12</i> | <i>49.08</i> | <b>42.25</b> | <i>42.63</i> | <i>53.26</i> | <b>45.80</b>  | <i>45.76</i>  | <i>44.41</i>  |
| Aromatic residues (F+H+W+Y)        | 10.97       | 10.85       | <b>10.95</b> | <i>7.63</i>  | <i>8.16</i>  | <i>8.79</i>  | <i>8.54</i>  | <i>7.67</i>  | <i>7.93</i>  | <b>7.76</b>  | <i>10.12</i> | <i>6.51</i>  | <b>6.85</b>   | <i>7.52</i>   | <i>10.25</i>  |

mesophilic L-ASNases (EcAI, EcAII, EcAIII) are in bold, thermo-ASNases are in italics. Decreased and increased amino acid content in thermo-ASNases compared to mesophilic counterparts is marked in red and green, respectively.
